# Supplementary material
Source: PubMed Central journal article supplement (PMC10259678)
Supplement: NIHMS1903745-supplement-Supplementary_Items.pdf [file NIHMS1903745-supplement-Supplementary_Items.pdf]

## SUPPLEMENTARY ITEMS

Table S1: Antibodies used for the PRISM-RNAi screen.

| Target          | Supplier and Cat. No.            | Host, clonality and isotype | Imaged with        | Conjugation method |
|-----------------|----------------------------------|-----------------------------|--------------------|--------------------|
| MAP2            | Novus Biologicals NB300-213      | Chicken polyclonal          | Secondary IF       | --                 |
| PSD95           | Cell Signaling Technology 3450   | Rabbit monoclonal           | Secondary PRISM    | --                 |
| Gephyrin        | Synaptic Systems 147208          | Rat IgG1                    | Secondary PRISM    | --                 |
| GluR2           | Synaptic Systems 182 105         | Guinea Pig polyclonal       | Secondary PRISM    | --                 |
| NR2A            | Neuromab 75-288                  | Mouse IgG2a                 | Secondary PRISM    | --                 |
| Shank3          | Synaptic Systems 162311          | Mouse IgG1                  | Secondary PRISM    | --                 |
| F-actin         | BACHEM H7643                     | Phalloidin                  | Direct PRISM – p2  | SMCC               |
| vGAT            | Synaptic Systems 131011          | Mouse IgG3                  | Direct PRISM – p3  | SMCC               |
| Bassoon         | Enzo Life Sciences ADI-VAM-PS003 | Mouse IgG2a                 | Direct PRISM – p8  | SMCC               |
| Synapsin1       | Synaptic Systems 106011          | Mouse IgG1                  | Direct PRISM – p9  | SMCC               |
| Homer1          | Synaptic Systems 160011          | Mouse IgG1                  | Direct PRISM – p10 | SiteClick          |
| vGlu1           | Synaptic Systems N1602           | Camelid sdAb                | Direct IF          |                    |
| anti-Rabbit     | Invitrogen A16126                | Goat polyclonal             | PRISM – p1         | SMCC               |
| anti-Mouse IgG1 | Abcam ab98689                    | Goat polyclonal             | PRISM – p4         | SMCC               |
| anti-Guinea Pig | Invitrogen A18777                | Goat polyclonal             | PRISM – p6         | SMCC               |
| anti-Rat        | Invitrogen A18873                | Goat polyclonal             | PRISM – p7         | SMCC               |
| anti-Mouse IgG2 | Novus Biologicals nb7513         | Goat polyclonal             | PRISM – p12        | SMCC               |

Table S2: Docking and Imaging strand sequences.

| Sequence Name | Docking Strand sequence (5' to 3') | ssLNA imaging probe sequence (5' to 3') | Fluorophore on LNA imaging probe |
|---------------|------------------------------------|-----------------------------------------|----------------------------------|
| p1            | TTATACATCTA                        | <b>T</b> AGAT <b>G</b> TATAA            | Atto 565                         |
| p2            | TTATCTACATA                        | TATG <b>T</b> AGATAA                    | Atto 565                         |
| p3            | TTTCTTCATTA                        | TAAT <b>G</b> AAGAAA                    | Atto 655                         |
| p4            | TTATGAATCTA                        | <b>T</b> AGAT <b>T</b> CATAA            | Atto 655                         |
| p6            | TTAATTGAGTA                        | <b>T</b> ACTCAATTAA                     | Atto 655                         |
| p7            | TTAATTAGGAT                        | <b>A</b> TCCTAATTAA                     | Atto 655                         |
| p8            | TTATAATGGAT                        | <b>A</b> TCCATTATAA                     | Atto 565                         |
| p9            | TTTAATAAGGT                        | <b>A</b> CCTTATTTAA                     | Atto 565                         |
| p10           | TTATAGAGAAG                        | <b>C</b> TTCTCTATAA                     | Atto 565                         |
| p12           | TTATAGTGATT                        | <b>A</b> ATCACTATAA                     | Atto 655                         |

Table S3: Accell siRNA mixtures and TaqMan RTqPCR primers.

| <b>Gene</b>         | <b>Accell siRNA<br/>Cat. No.</b> | <b>TaqMan RTqPCR<br/>Assay ID</b> |
|---------------------|----------------------------------|-----------------------------------|
| <i>Nontargeting</i> | D-001910-10-20                   |                                   |
| <i>Dyrk1a</i>       | E-090285-00                      | Rn00562940_m1                     |
| <i>Trio</i>         | E-087912-00                      | Rn01524285_m1                     |
| <i>Cul1</i>         | E-094875-00                      | Rn01501284_m1                     |
| <i>Setd5</i>        | E-095571-00                      | Rn01425934_m1                     |
| <i>Sp4</i>          | E-090979-00                      | Rn00562717_m1                     |
| <i>Chd8</i>         | E-098578-00                      | Rn00576005_m1                     |
| <i>Herc1</i>        | E-101129-00                      | Rn01421830_m1                     |
| <i>Shank3</i>       | E-080173-00                      | Rn00572344_m1                     |
| <i>Scn2a</i>        | E-097072-00                      | Rn00680558_m1                     |
| <i>Gria3</i>        | E-088270-00                      | Rn00583547_m1                     |
| <i>Cacna1g</i>      | E-089308-00                      | Rn00709287_m1                     |
| <i>Fmr1</i>         | E-091941-00                      | Rn00709627_m1                     |
| <i>Syngap1</i>      | E-080169-00                      | Rn00710435_m1                     |
| <i>Setd1a</i>       | E-051358-00                      | Mm00626141_m1                     |
| <i>Grin2a</i>       | E-091573-00                      | Rn00561341_m1                     |
| <i>Pten</i>         | E-080104-00                      | Rn00477208_m1                     |
| <i>Xpo7</i>         | E-087157-00                      | Rn01493200_m1                     |
| <i>Actb</i>         |                                  | Rn00667869_m1                     |

Supplementary Figures

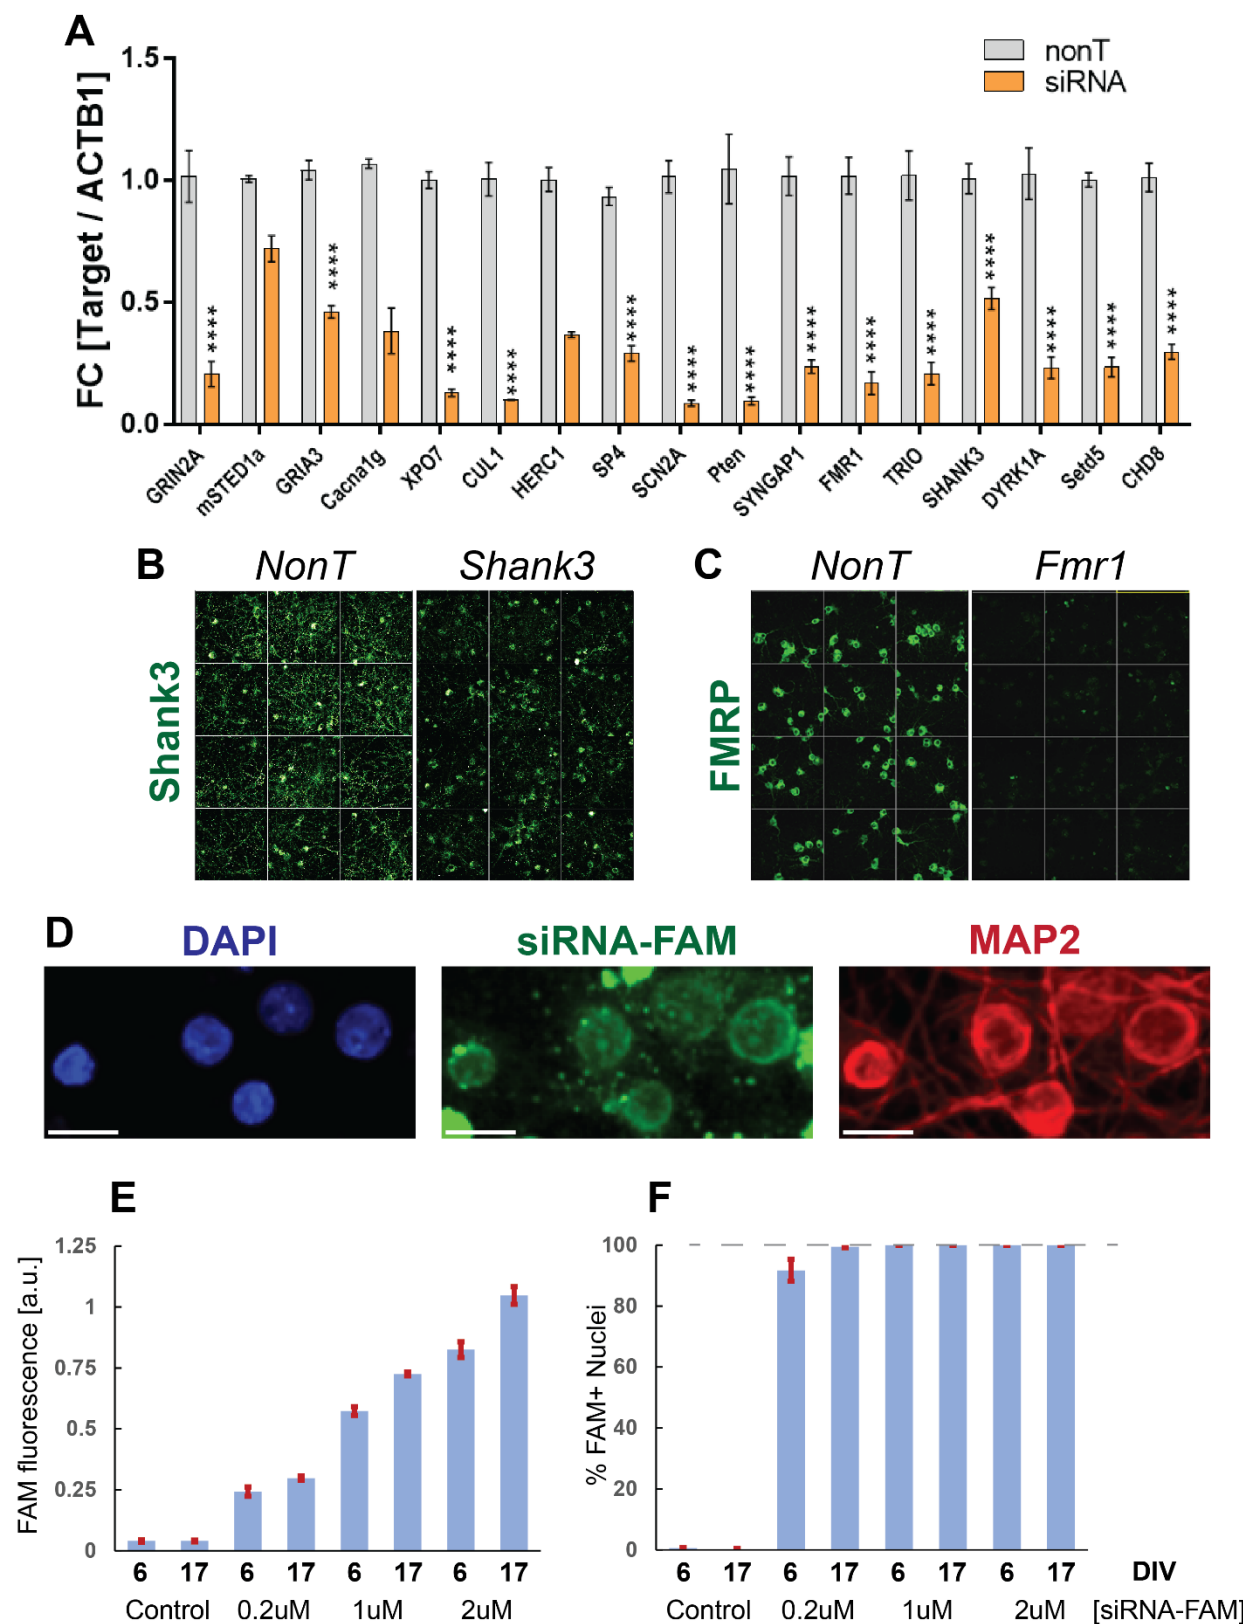

**Figure S1: RNAi knockdown validation.** Related to Figure 2. A) RTqPCR of transcript abundances of the perturbed genes in rat embryonic hippocampal neurons after siRNA treatment at DIV 5 and harvest at DIV 21. Y-axis is normalized to NonT and to ACTB1 mRNA levels. Error bars indicate SEM across cultures. \*\*\*\* $p < 0.001$ . B,C) Immunofluorescence of Shank3 (B) and FMRP (C) in siRNA-treated vs NonT-treated cultures. D) Images of neurons treated with a FAM-labeled nontargeting siRNA. Scale bar is 50 $\mu$ m. E) Average fluorescence integral of FAM over DAPI-identified nuclei for the treatment conditions. F) Fraction of nuclei with significantly above background levels of FAM fluorescence. 'Control' indicates cultures treated with a FAM-labeled non-self-transfecting short oligo. Error bars are SEM across 3-4 cultures.

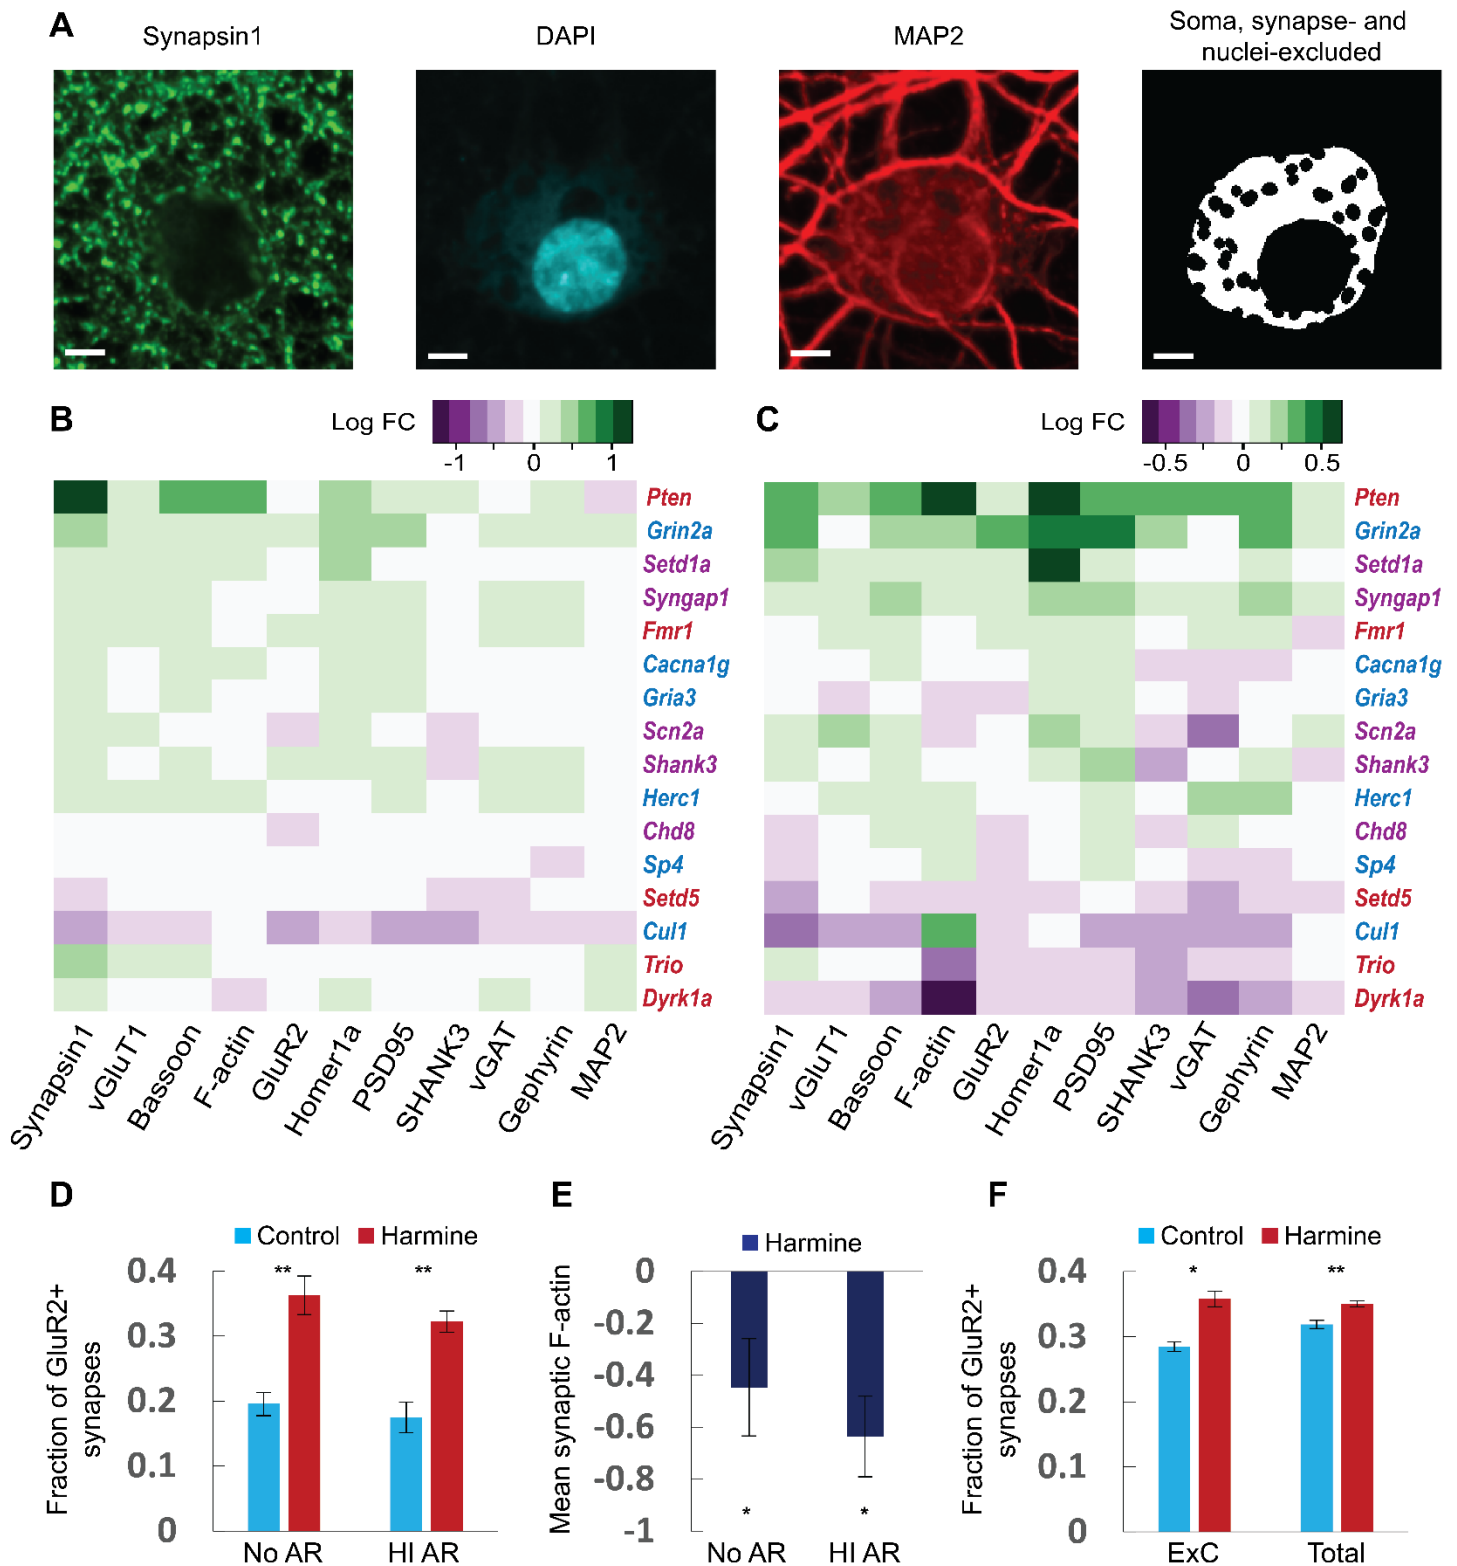

**Figure S2: Additional measurements of synaptic protein phenotypes.** Related to Figure 2. A) Representative images of Synapsin1, DAPI and MAP2 used to define synapse- and nuclei-excluded soma to quantify somatic protein levels. B) Log-fold-change of average somatic levels of each protein under each gene knockdown, relative to nontargeting control. C) Log-fold changes of average overall levels (mean intensity value over nucleus-excluded image). D-E) Effect of Harmine treatment on fraction of GluR2-positive Synapsin1 puncta (D) and average synaptic F-actin (E) in staining with no antigen retrieval step (No AR) and with heat and acid-induced antigen retrieval (HI AR). F) Effect of Harmine treatment on externalized GluR2 (stained via an N-terminal targeting antibody without permeabilization) and total GluR2 (stained after permeabilization). \* $p < 0.05$ , \*\* $p < 0.01$ , two-sided t-test. D-F data are mean  $\pm$  s.e.m.

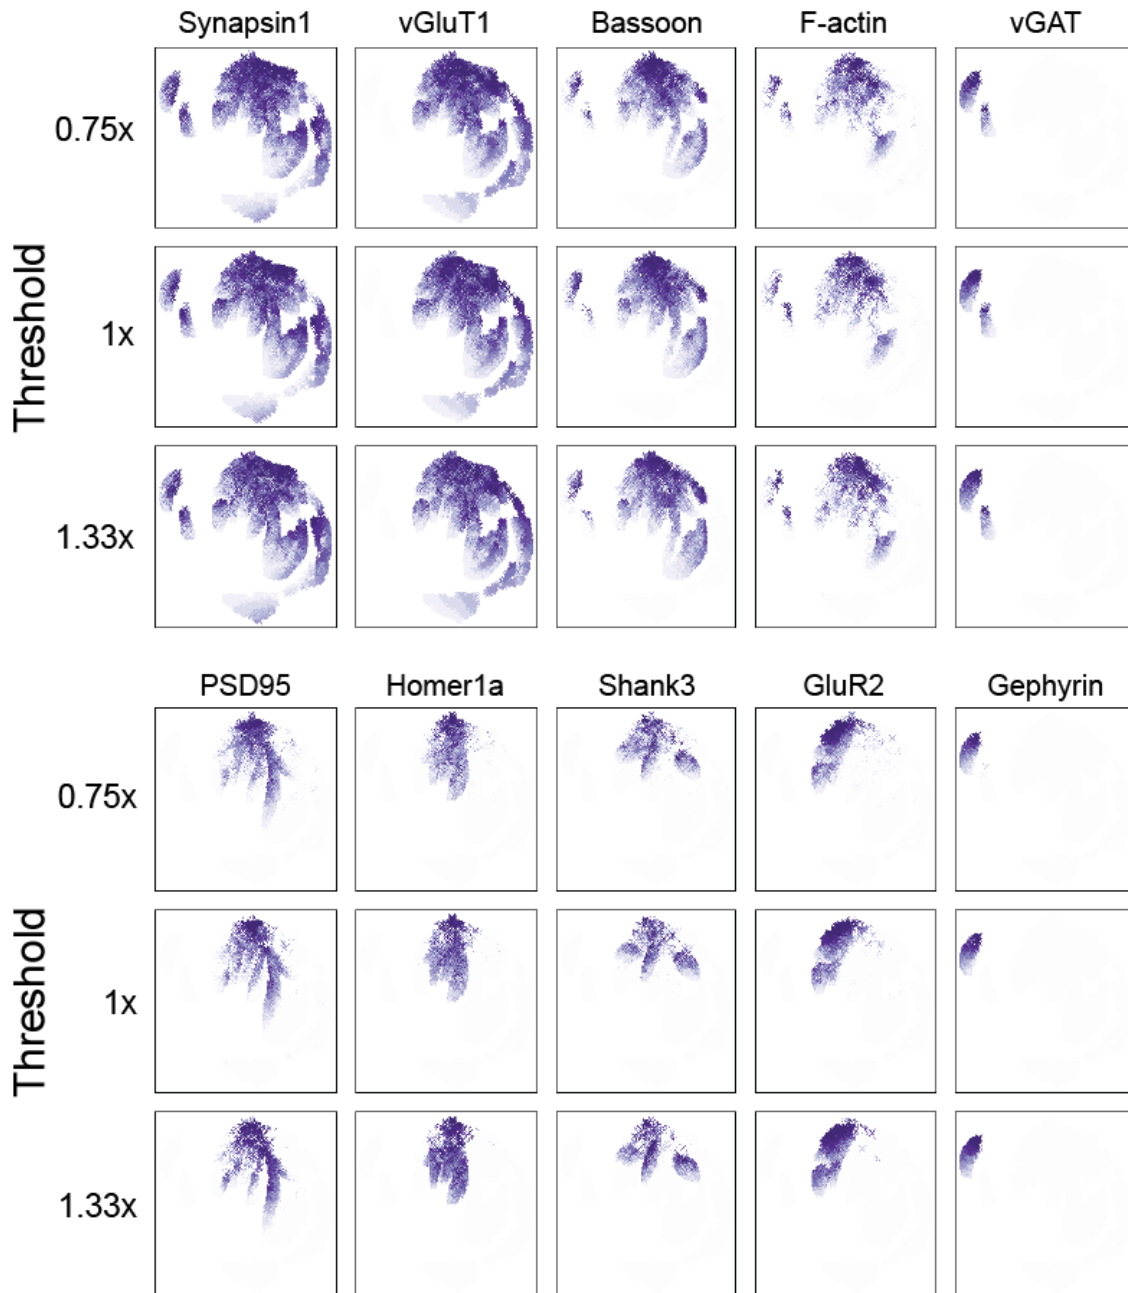

**Figure S3: UMAP plot of data sampled from synapses thresholded at three levels, colored by protein level.** Related to Figure 3. Synapses for each threshold exhibit clusters defined by presence and absence of protein combinations.

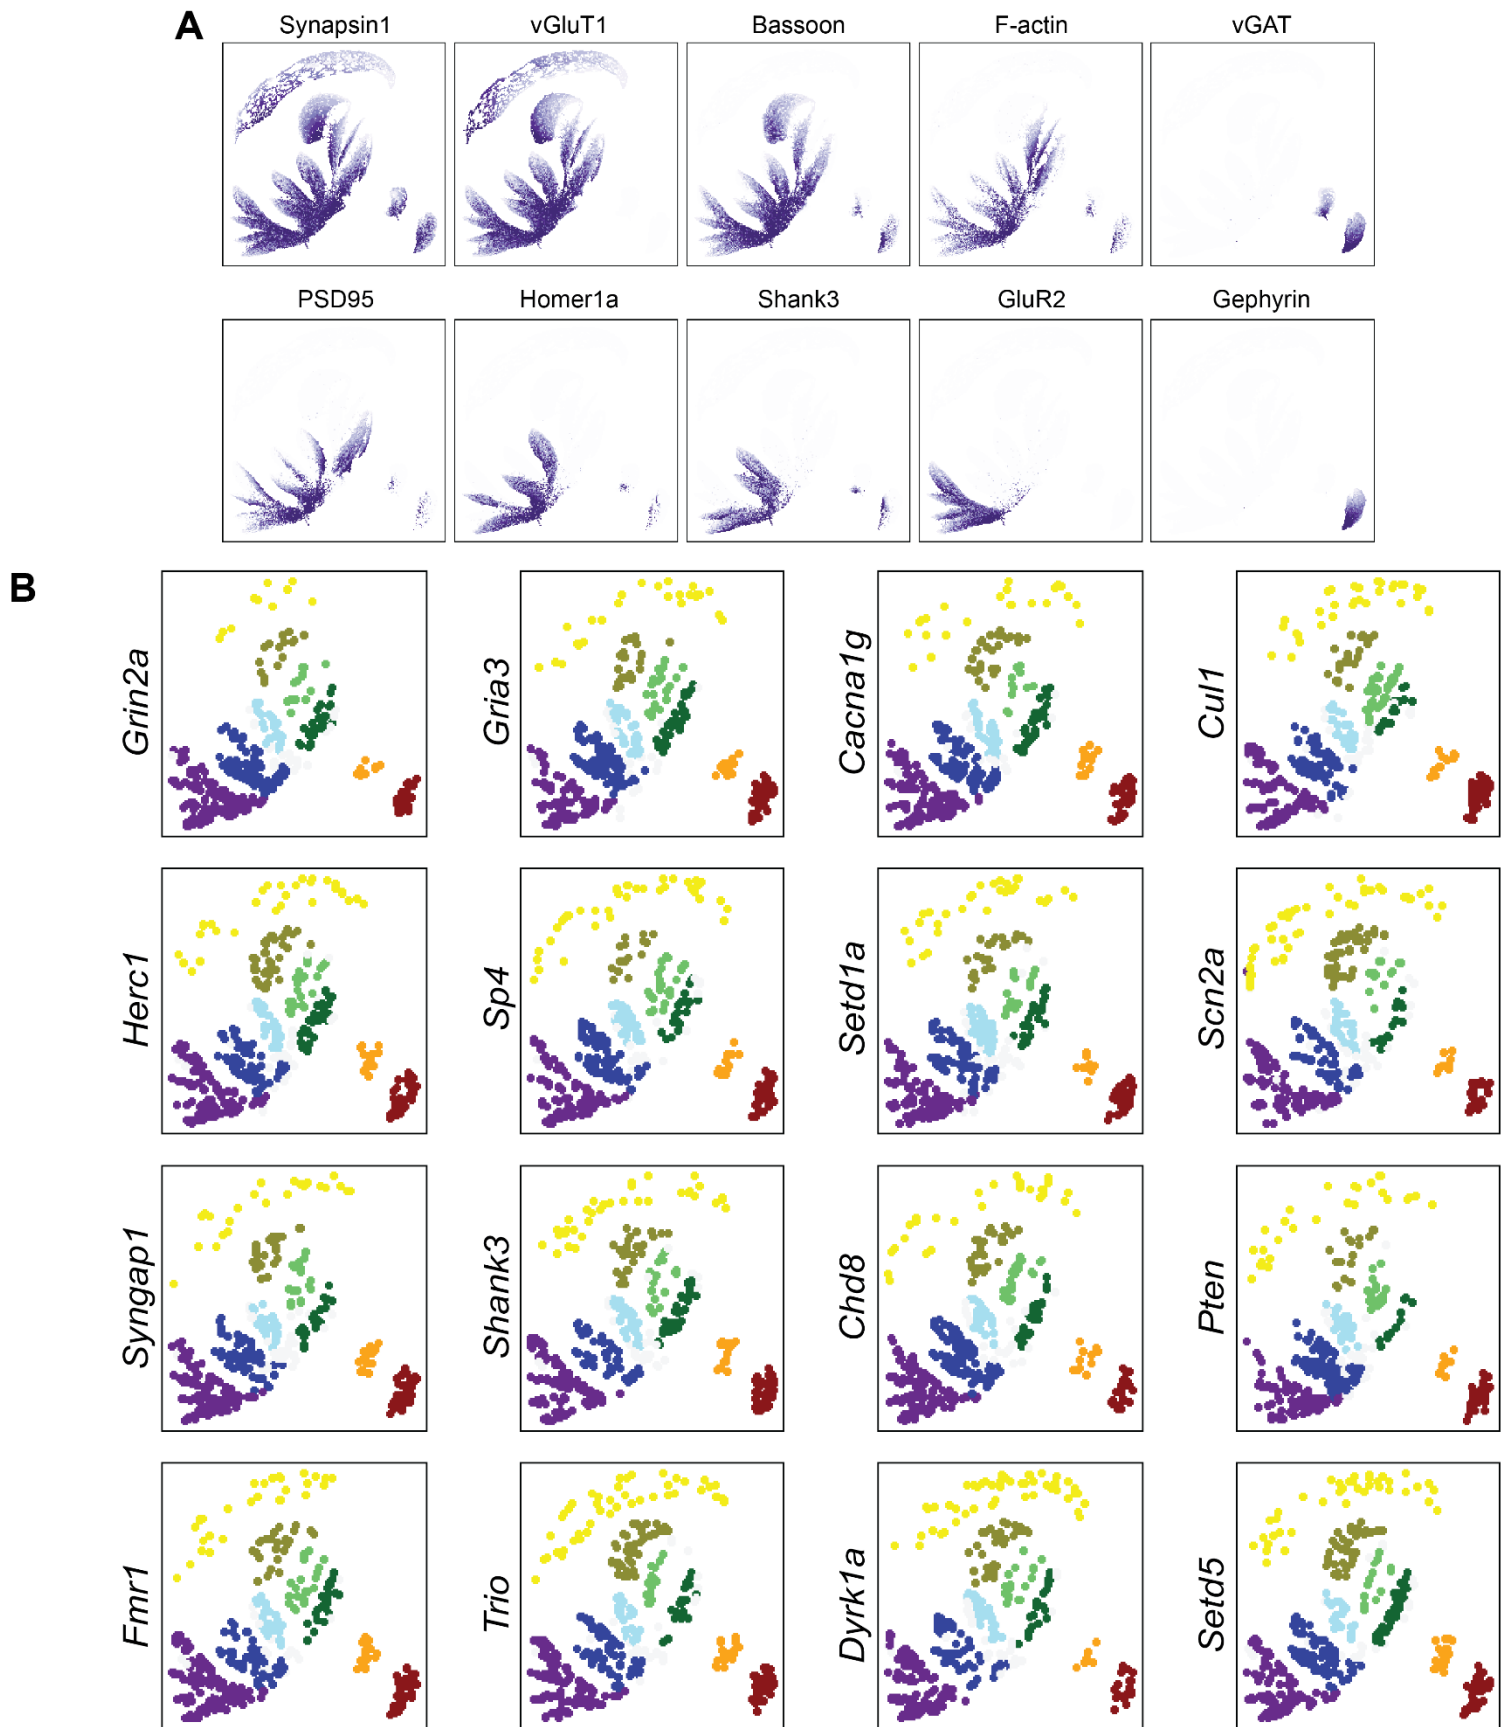

**Figure S4: A) UMAP projections colored by levels of individual proteins. B) UMAP projections of synapses from each treatment group.** Related to Figure 3.

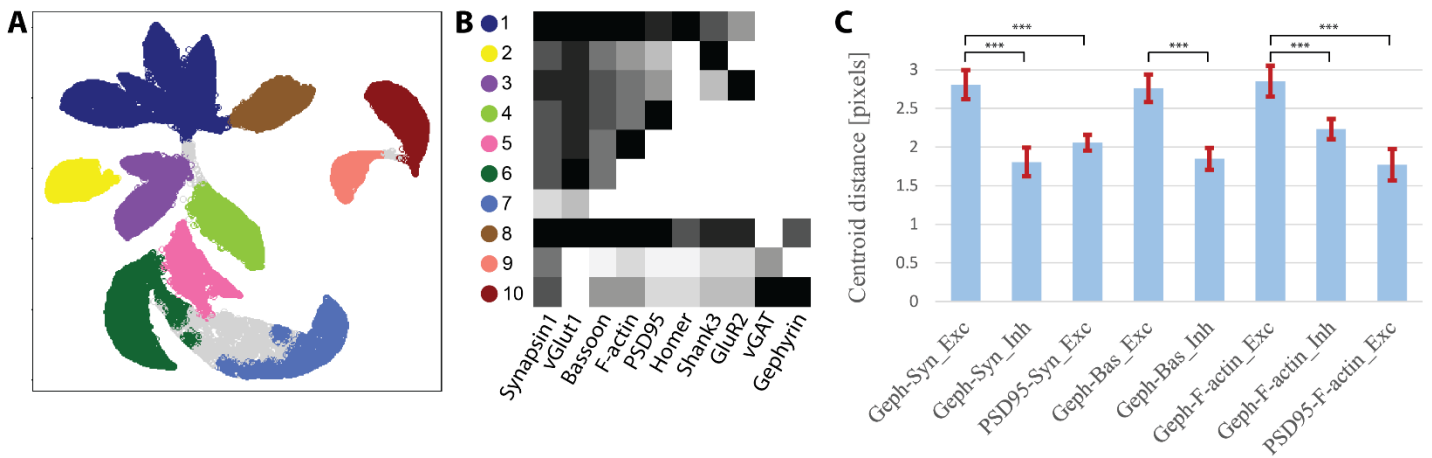

**Figure S5: Multiplexed information-based data cleanup.** Related to Figure 3 and Star Methods. A,B) UMAP projection and unsupervised density-based clustering (A) of all synapses, and heatmap of average protein levels per cluster (B) similar to figure 3 but with an additional cluster (#8) of synapses positive for Gephyrin and vGluT. C) Average distances (in pixels) between centroids of puncta of different proteins in synaptic subsets. Left to right: Gephyrin-Synapsin in cluster #8, Gephyrin-Synapsin in cluster #10, PSD95-Synapsin across all PSD95+ excitatory synapses, Gephyrin-Bassoon in cluster #8, Gephyrin-Bassoon in cluster #10, Gephyrin-F-actin in cluster #8, Gephyrin-F-actin in cluster #10, and PSD95-F-actin across all PSD95+, F-actin+ excitatory synapses. Error bars are standard deviations across all wells. \*\*\* $p < 0.0001$ . Bars are mean  $\pm$  s.e.m.

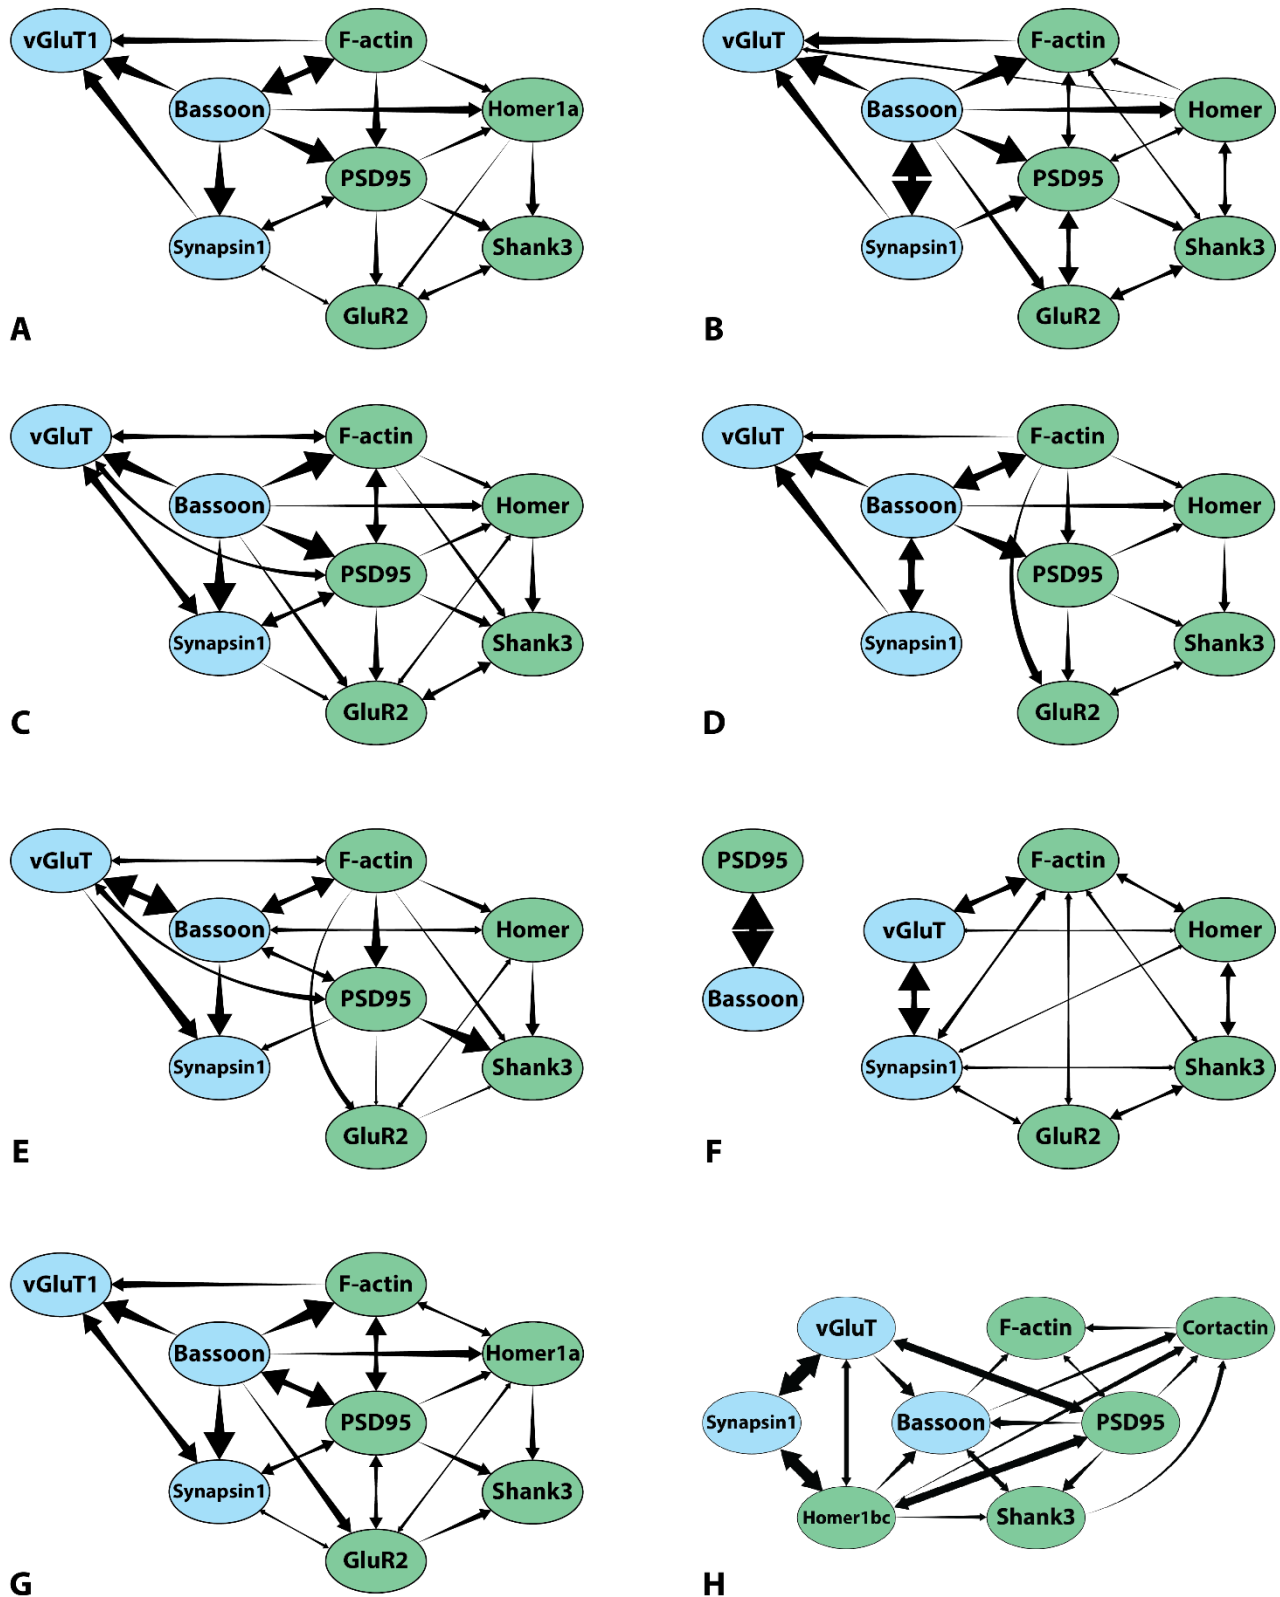

**Figure S6: Bayesian networks derived from modified data.** Related to Figure 5. A) Original network. B) Network derived only from the subset of synapses which are positive for all components. C) Network derived on data with 25% lower threshold. D) Network derived on data with 33% higher threshold. E) Network derived on data in which synapses were identified (during CellProfiler analysis) not by Synapsin1 puncta but by a combination of F-actin and PSD95 puncta. F) Network derived from the original data, but with data for Bassoon and PSD95 levels randomly permuted together. G) Bayesian network derived on data with Shank3 knockdown cultures excluded. H) Bayesian network derived on data from a previous study. 6 proteins are the same in both studies – Synapsin1, vGluT1, Bassoon, Shank3, F-actin and PSD95 – but different antibodies were used. Homer1bc was replaced by Homer1a in this study, and Cortactin by GluR2.
